# Supplementary material for: Three-Dimensional-QSAR and Relative Binding Affinity Estimation of Focal Adhesion Kinase Inhibitors
Source: MDPI journal article supplement (doi:10.3390/molecules28031464), 2023-02-02
Supplement: s1 [file s1]

# Three-dimensional-QSAR and Relative Binding Affinity Estimation of Focal Adhesion Kinase Inhibitors

Suparna Ghosh <sup>1</sup> and Seung Joo Cho <sup>1,2,\*</sup>

<sup>1</sup>Department of Biomedical Sciences, College of Medicine, Chosun University, Gwangju 501-759, Republic of Korea

<sup>2</sup>Department of Cellular Molecular Medicine, College of Medicine, Chosun University, Gwangju 501-759, Republic of Korea

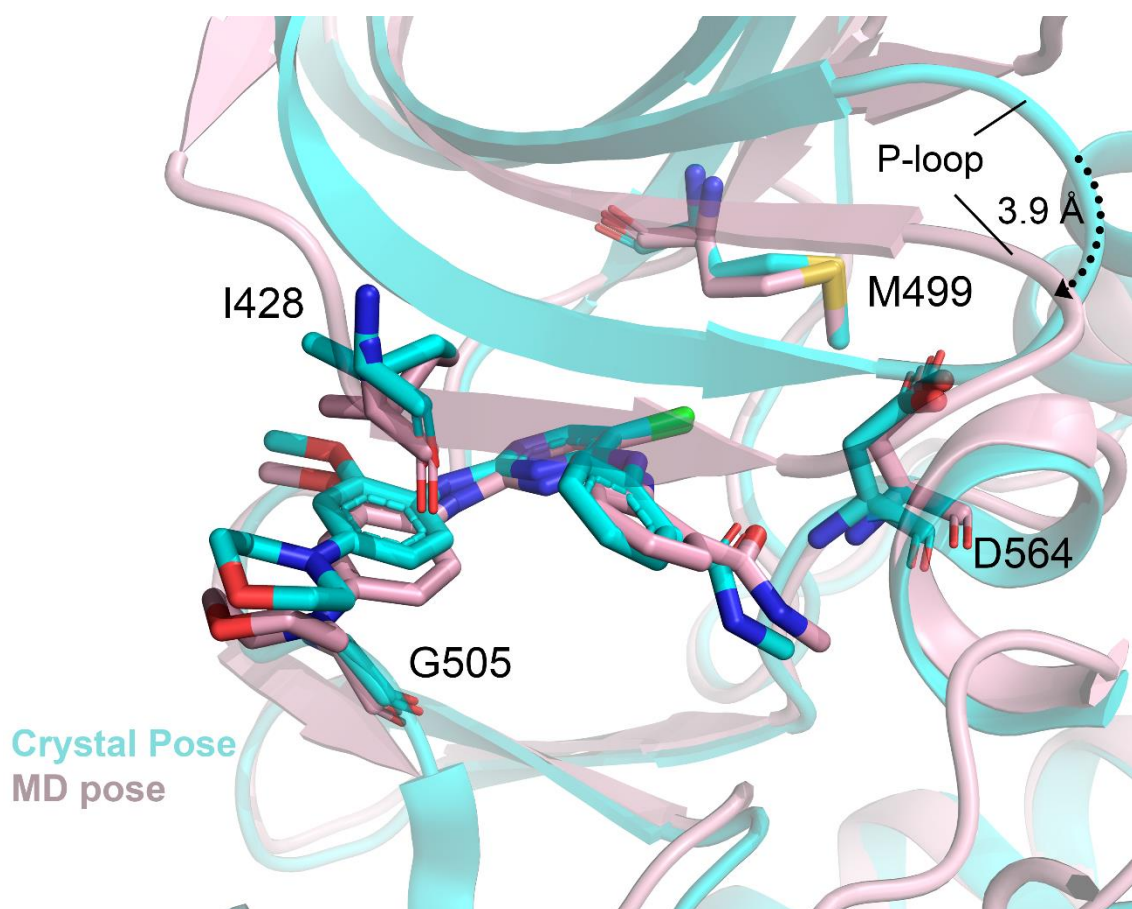

**Figure S1.** Binding poses comparison of TAE226 compound between MD and crystal form. The original crystal complex comprises homodimer of chain A and B. TAE226 is missing from Chain A, although it is present in Chain B. For the MD study, only TAE226 bound was considered.

**Table S1.** MM-PB/GBSA binding energy terms

| Binding energy terms     | BE in kcal/mol |
|--------------------------|----------------|
| VDW                      | -58.85 ± 2.34  |
| EEL                      | -16.96 ± 2.78  |
| EGB                      | 29.54 ± 1.89   |
| ESURF                    | -6.49 ± 0.16   |
| $\Delta G_{\text{gas}}$  | -75.81 ± 3.70  |
| $\Delta G_{\text{solv}}$ | 23.05 ± 1.82   |

|                           |                   |
|---------------------------|-------------------|
| $\Delta T_{\text{TOTAL}}$ | $-52.76 \pm 2.95$ |
| $T_{\text{AS}}$           | $7.51 \pm 0.04$   |
| $\Delta G_{\text{bind}}$  | $-45.25 \pm 2.95$ |

**Table S2.** Residue-specific MM-PB/GBSA binding energy decomposition in kcal/mol.

| Residues | BE               |
|----------|------------------|
| I428     | $-3.25 \pm 0.44$ |
| V436     | $-1.43 \pm 0.26$ |
| V484     | $-0.70 \pm 0.15$ |
| M499     | $-0.69 \pm 0.14$ |
| L501     | $-2.37 \pm 0.34$ |
| C502     | $-1.97 \pm 0.53$ |
| G505     | $-2.25 \pm 0.34$ |
| L553     | $-2.87 \pm 0.38$ |
| G563     | $-1.04 \pm 0.42$ |
| D564     | $-2.61 \pm 0.44$ |
| L567     | $-2.18 \pm 0.30$ |

**Table S3.** Dataset compounds and their corresponding  $\text{pIC}_{50}$  values.

| #Cpd | Structure                                                                           | $\text{pIC}_{50}$ |
|------|-------------------------------------------------------------------------------------|-------------------|
| 01   | 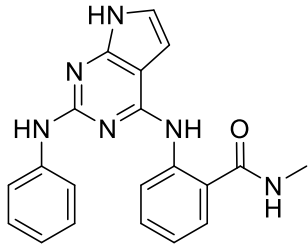 | 6.76              |
| 02   |  | 7.22              |
| 03   |  | 7.17              |

04

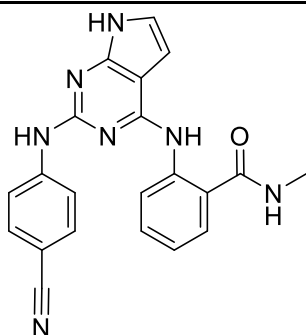

7.20

05

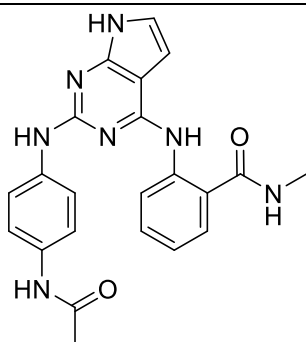

7.23

06

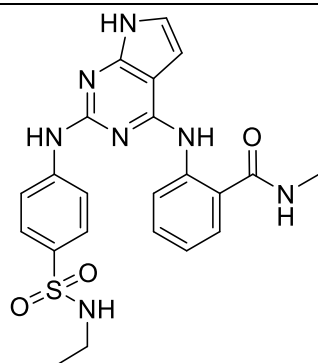

7.48

07

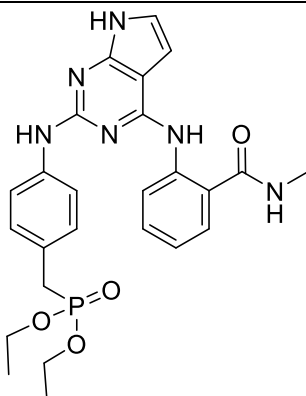

6.94

08

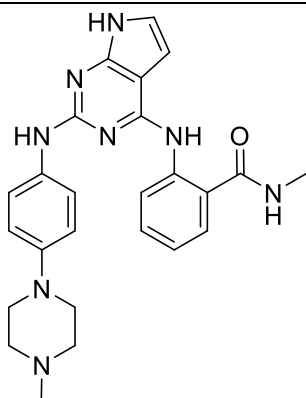

7.71

09

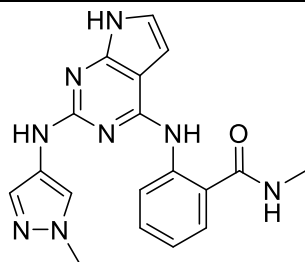

7.19

10

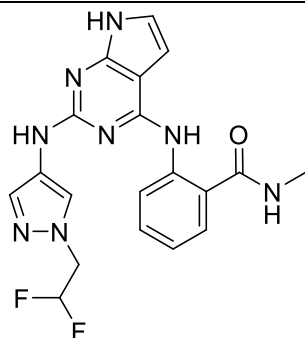

7.05

11

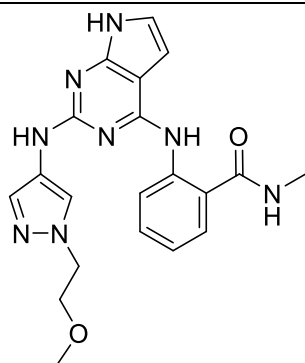

7.26

12

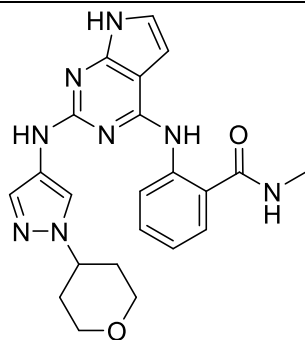

7.32

13

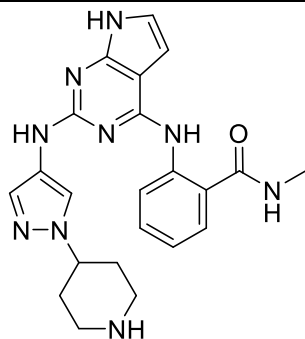

7.65

14

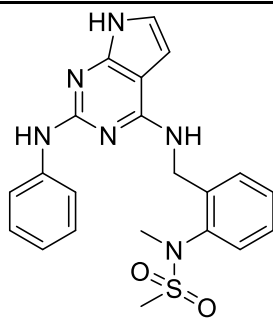

7.23

15

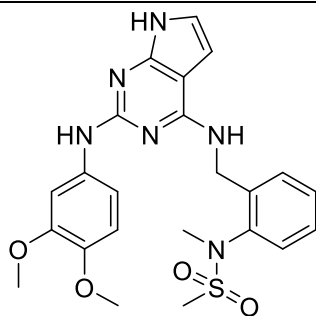

7.54

16

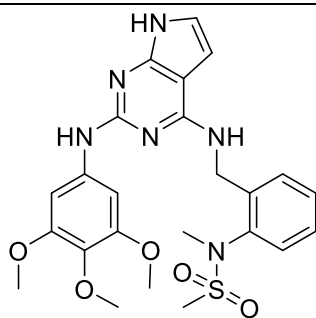

7.64

17

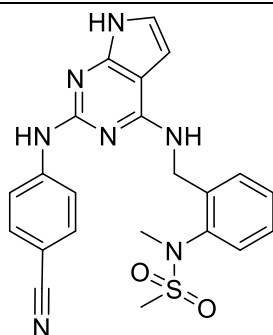

7.64

18

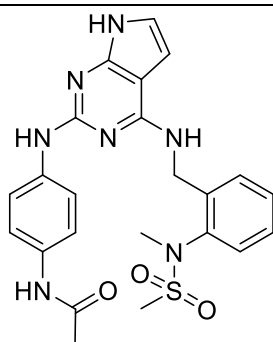

7.62

19

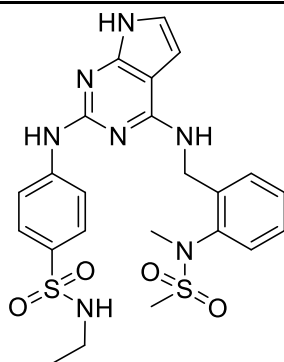

7.94

20

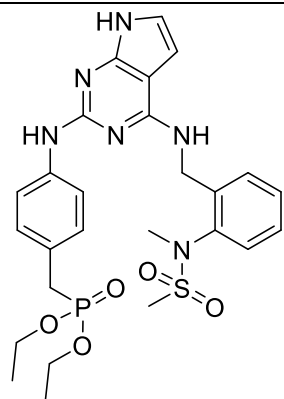

7.36

21

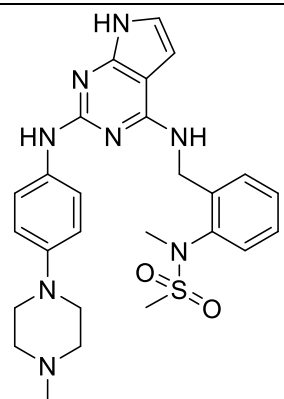

7.58

22

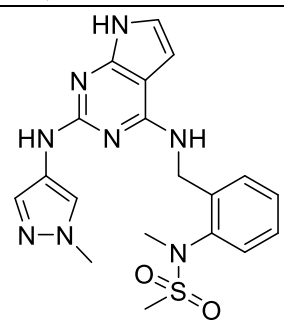

7.81

23

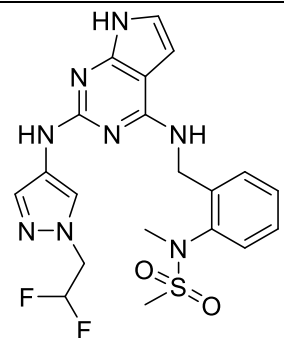

7.42



28

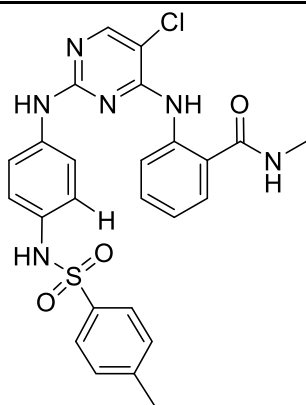

7.08

29

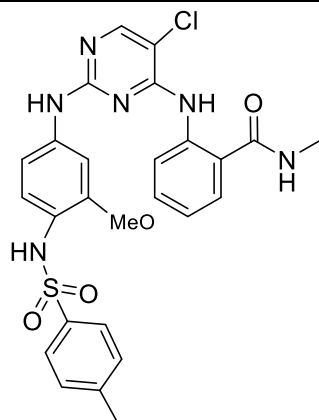

6.96

30

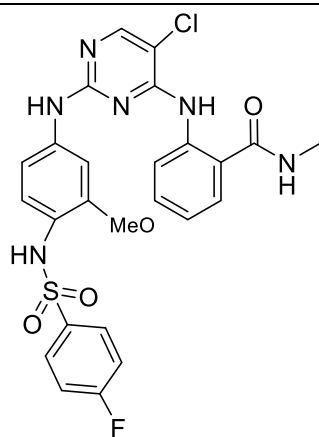

7.07

31

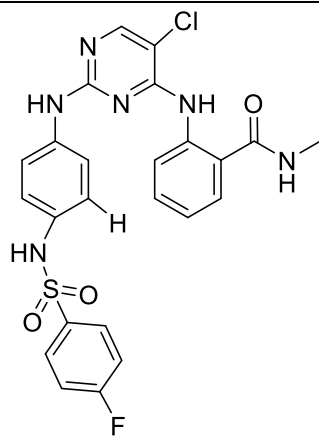

7.06



32

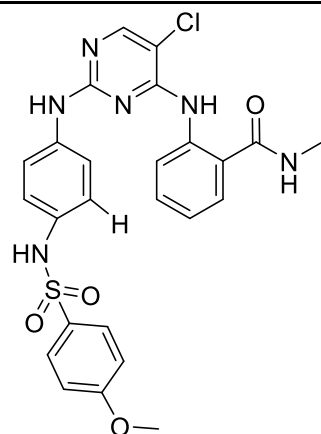

6.95

33

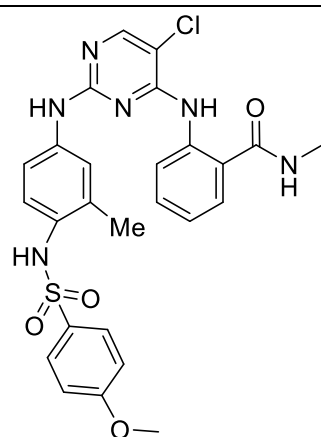

6.94

34

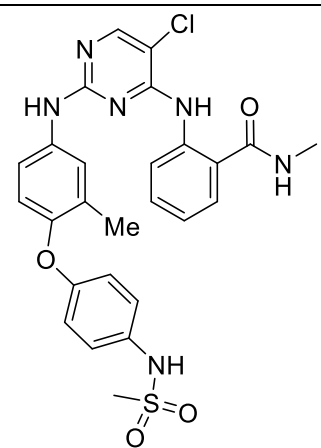

6.96

35

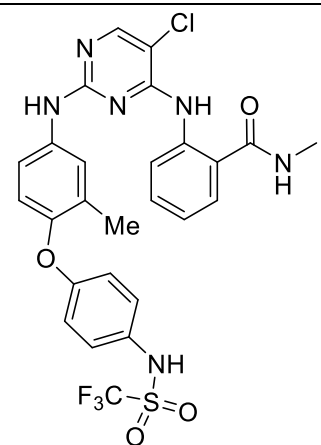

6.62

36

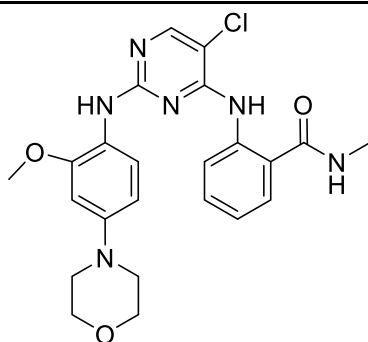

8.2

37

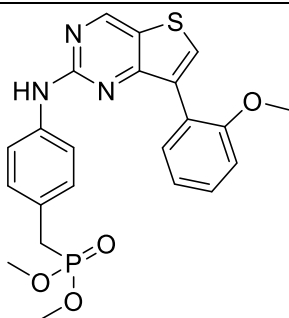

6.87

38

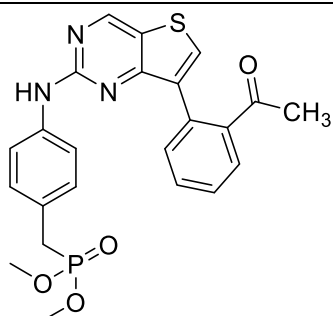

5.96

39

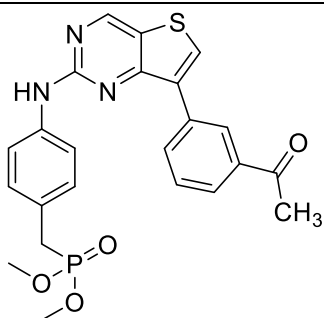

6.45

40

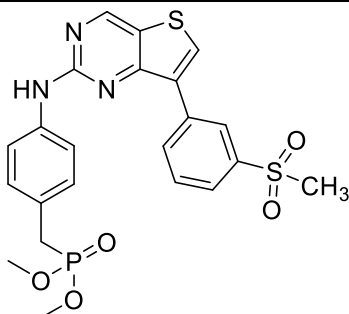

6.85

41

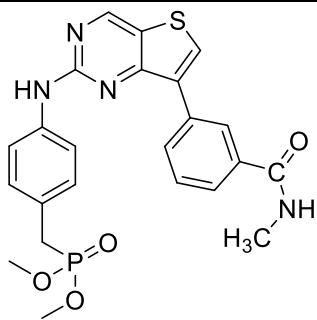

6.48

42

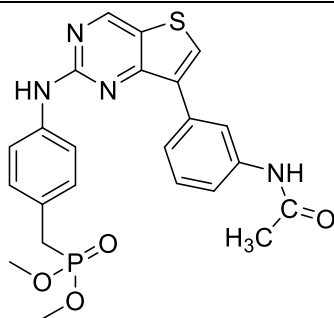

6.42

43

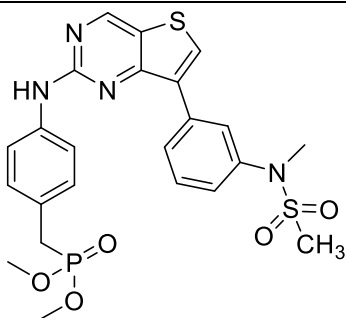

6.19

44

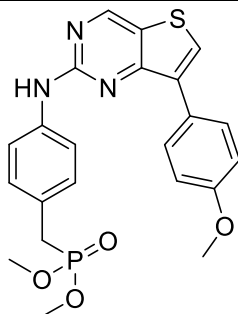

5.97

45

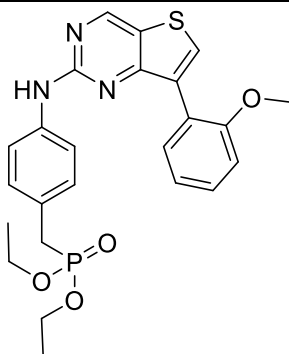

6.80

46

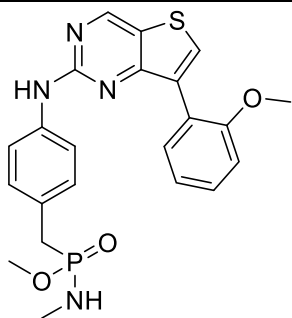

6.73

47

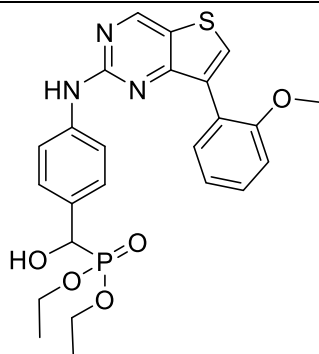

6.49

48

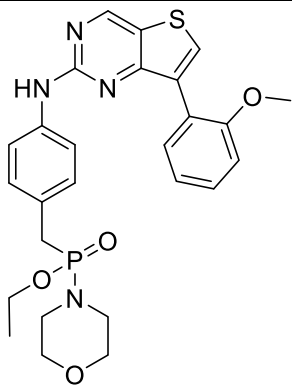

6.45

49

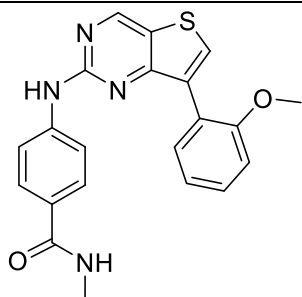

7.10

50

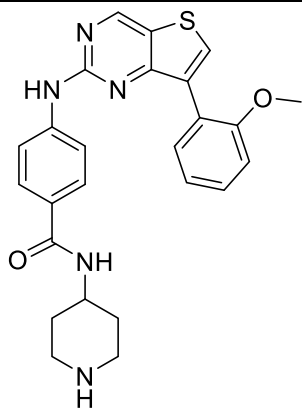

7.41

51

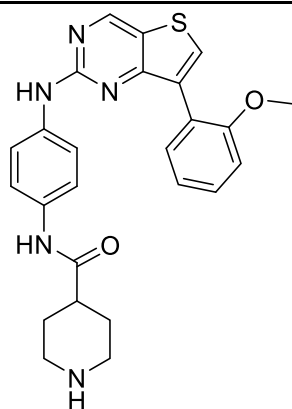

7.23

52

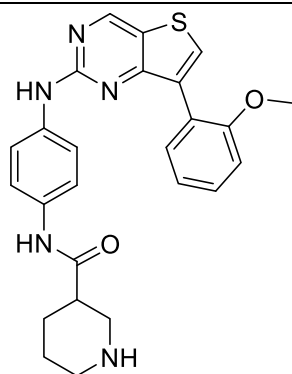

6.77

53

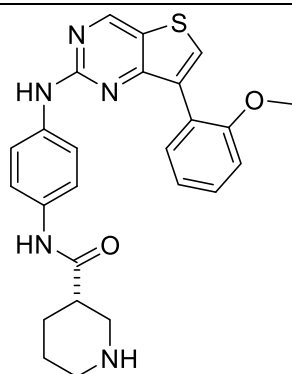

6.70

54

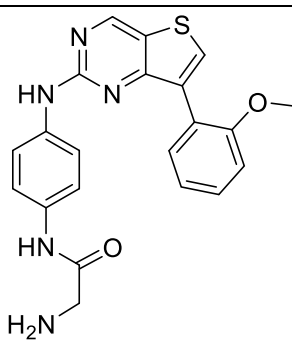

6.48

55

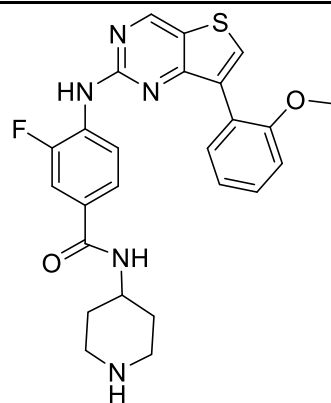

7.31

56

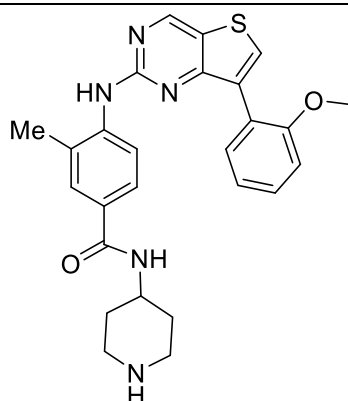

7.57

57

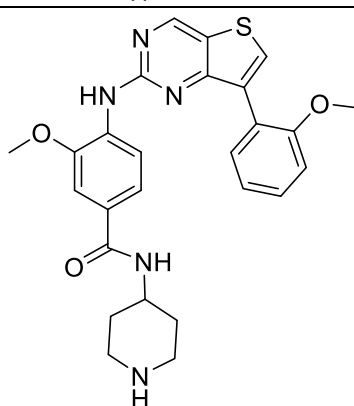

7.56

58

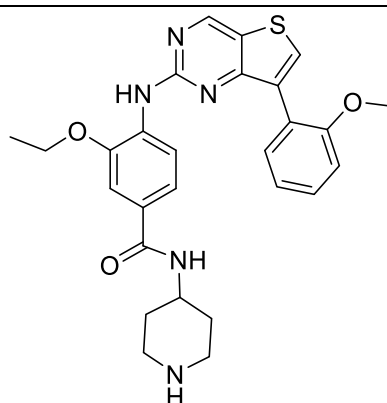

6.78

59

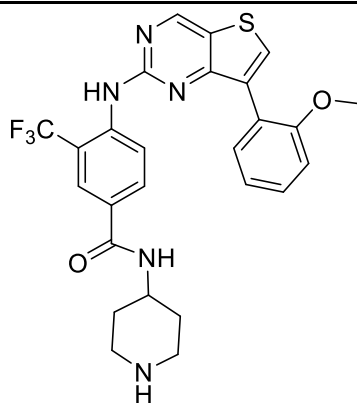

6.14

60

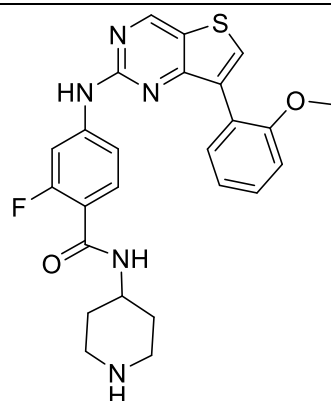

7.54

61

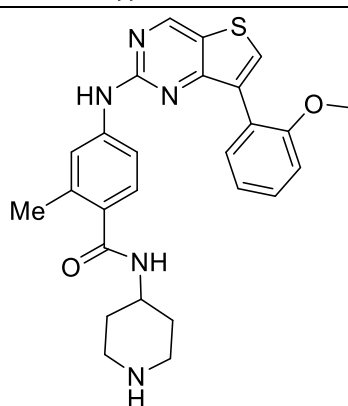

7.59

62

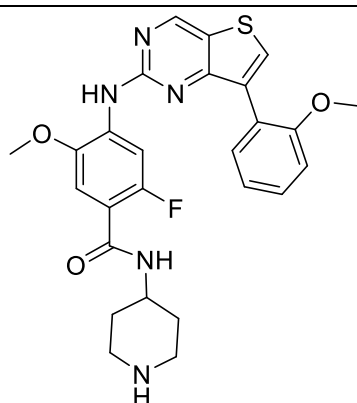

7.41

63

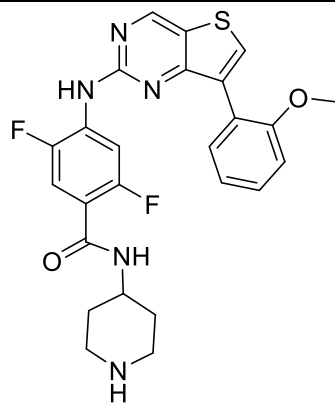

7.61

64

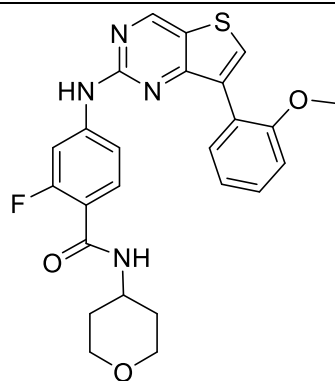

6.92

65

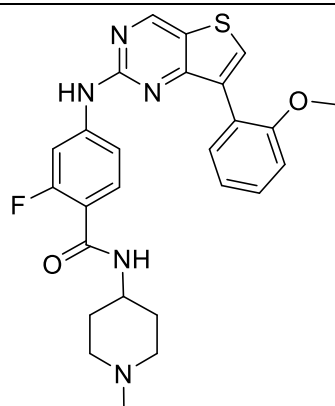

7.31

66

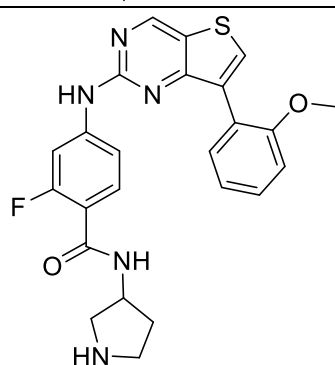

6.87



67

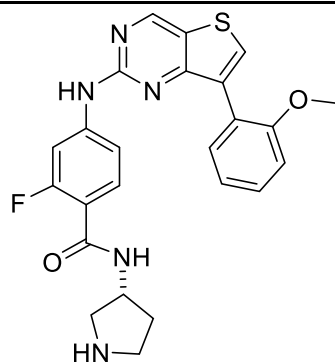

7.14

68

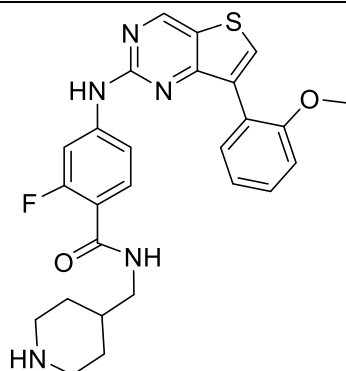

6.92

69

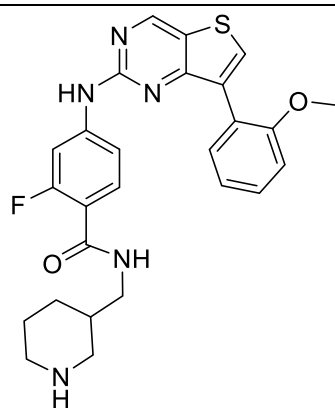

6.95

70

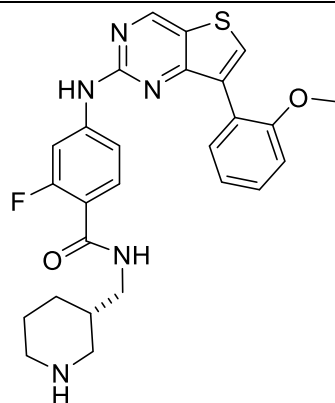

6.82

71

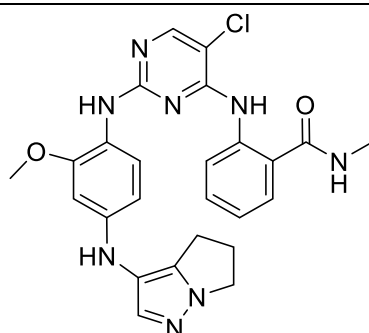

9.55

72

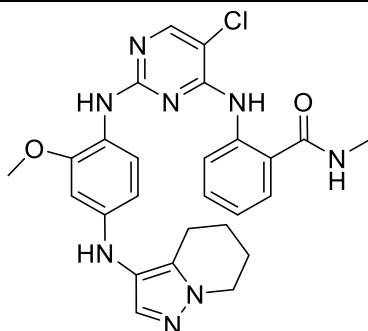

9.35

73

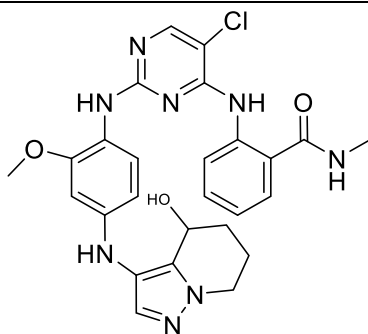

7.53

74

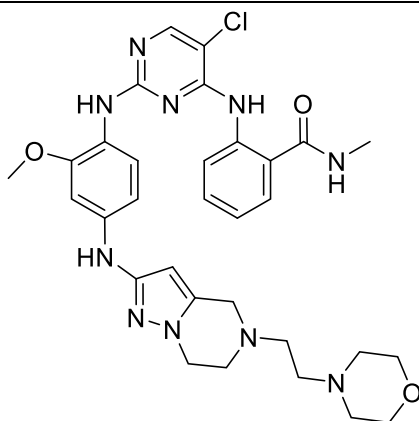

8.88

75

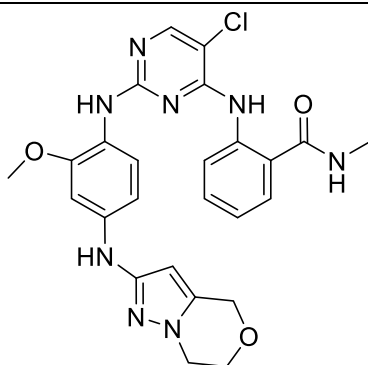

8.74

76

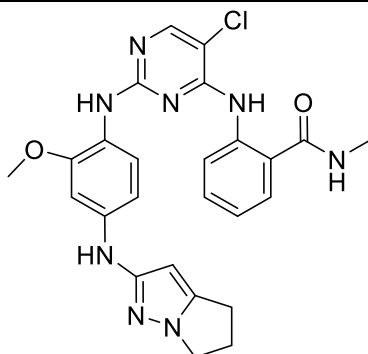

9.24

77

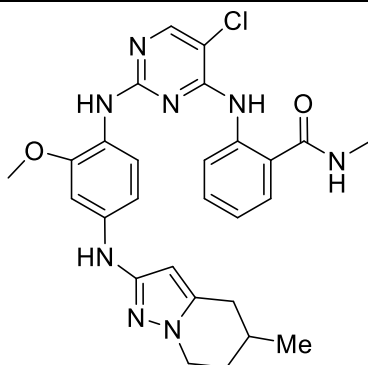

9.95

78

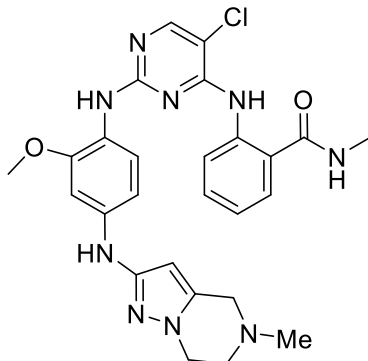

8.60

79

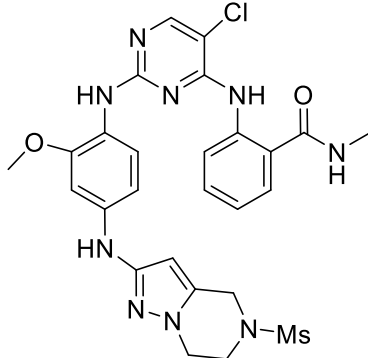

9.35

80

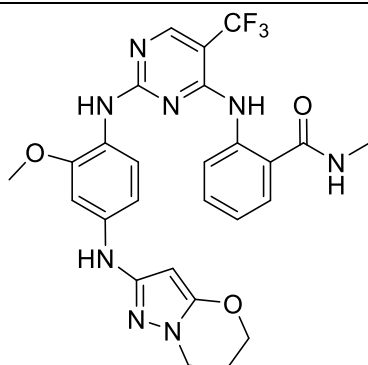

9.46

81

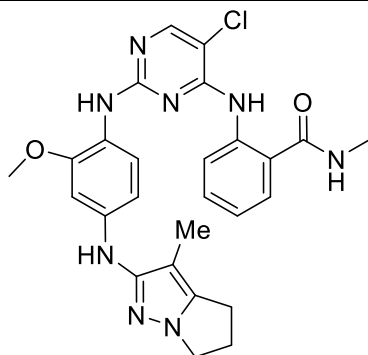

10.04

82

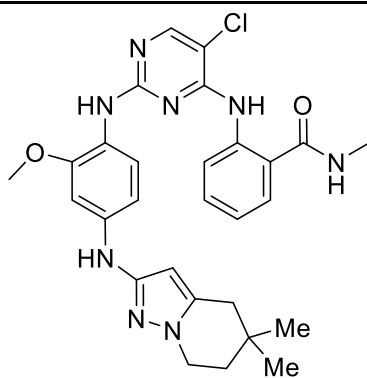

8.29

83

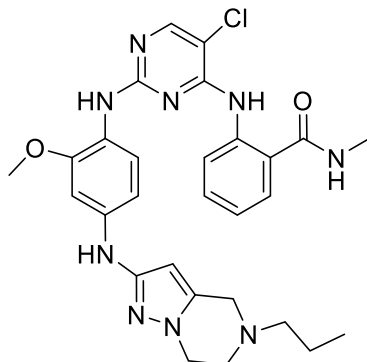

8.49

84

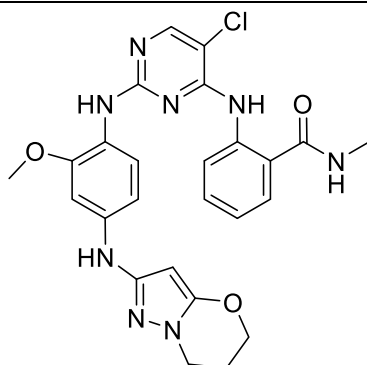

9.37

85

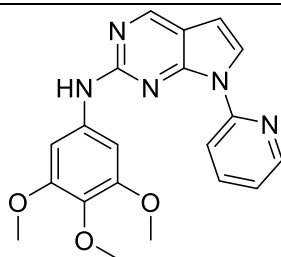

6.69

86

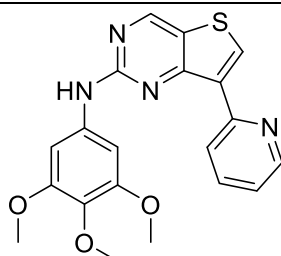

7.74

87

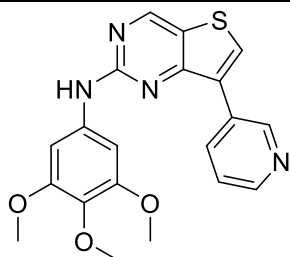

7.58

88

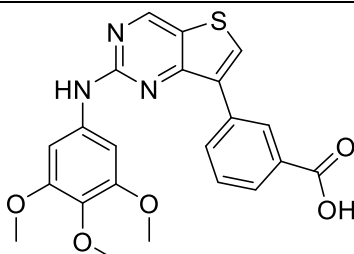

7.30

89

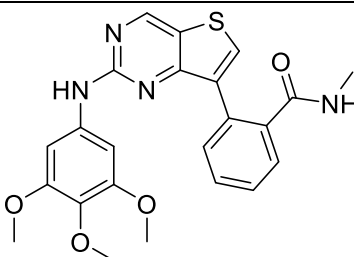

7.25

90

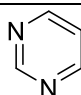

pyrimidine

6.17

91

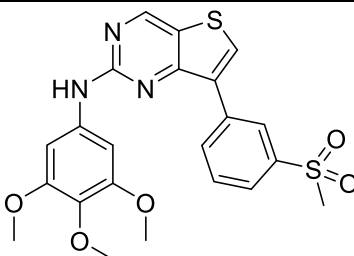

7.04

92

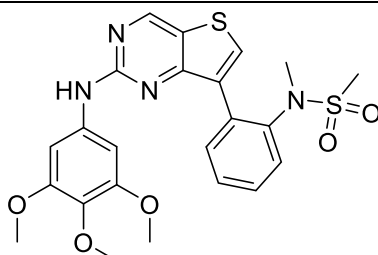

7.82

93

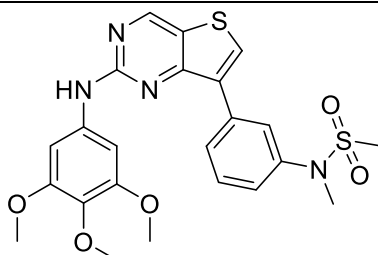

7.45

94

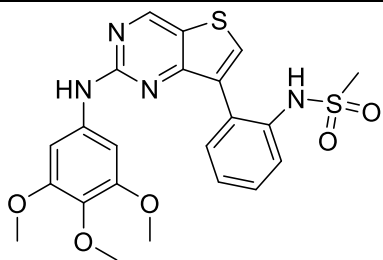

7.10

95

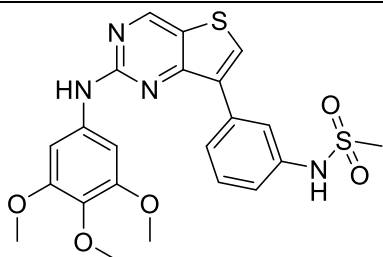

8.15

96

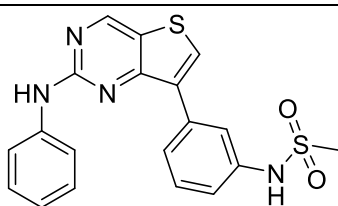

7.52

97

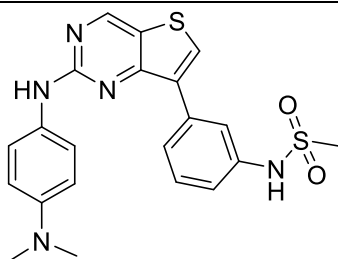

7.74

98

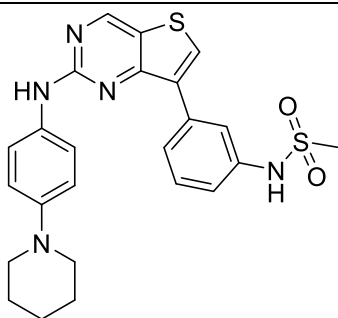

7.16

99

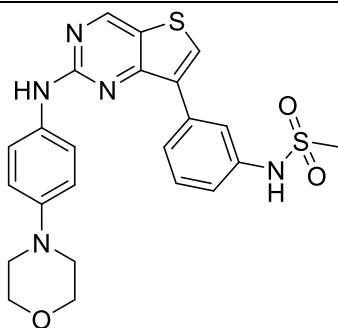

8.09

100

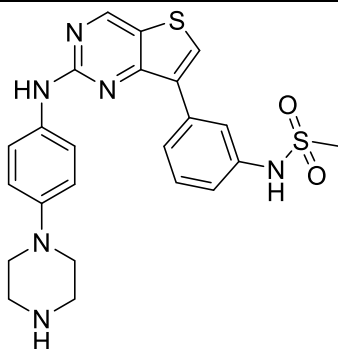

7.92

101

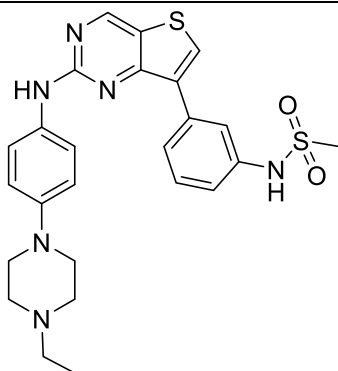

8.15

102

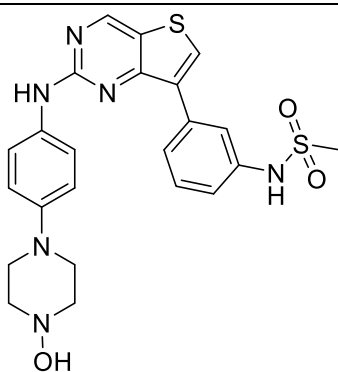

7.79

103

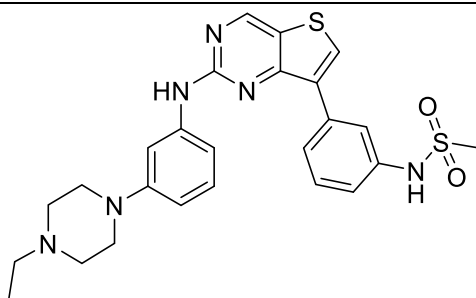

7.88

104

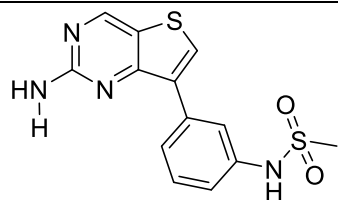

5.39

105

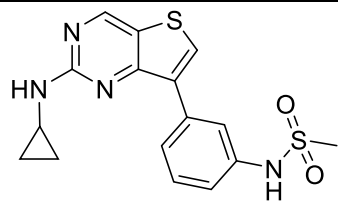

5.62

106

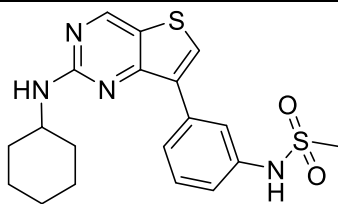

6.14

107

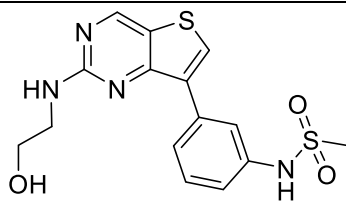

NA

108

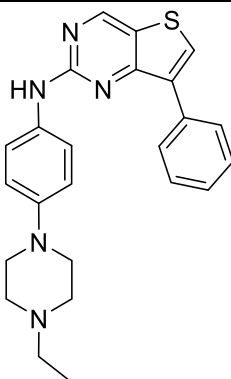

8.00

109

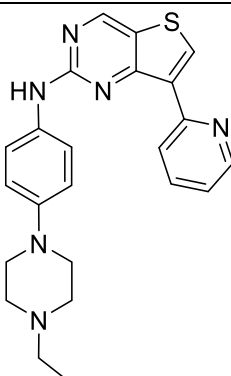

7.92

110

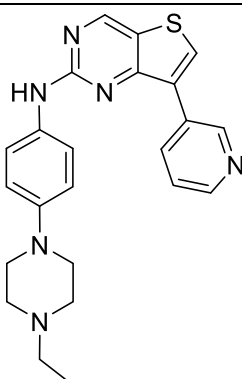

7.50



111

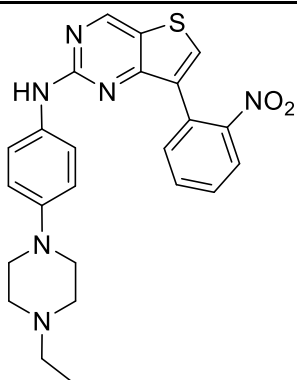

6.44

112

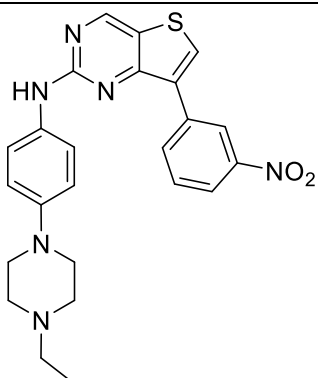

7.67

113

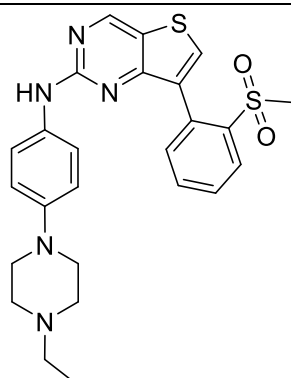

6.71

114

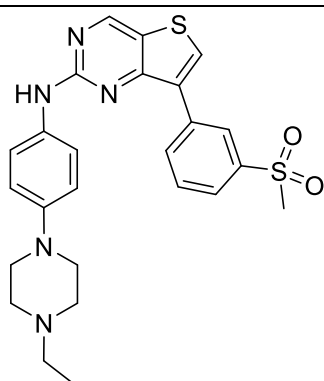

7.74

115

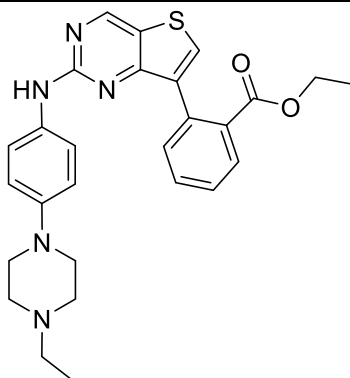

5.78

116

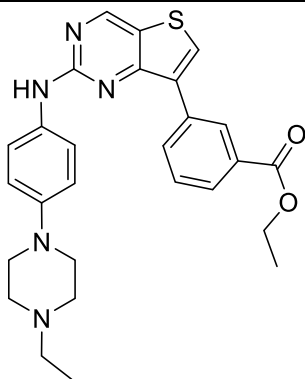

6.49

117

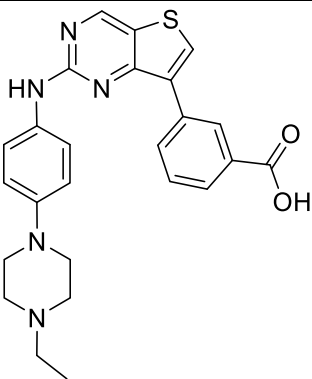

7.22

118

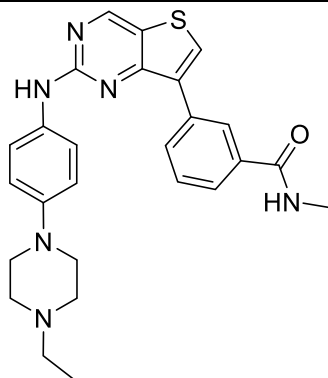

7.44

119

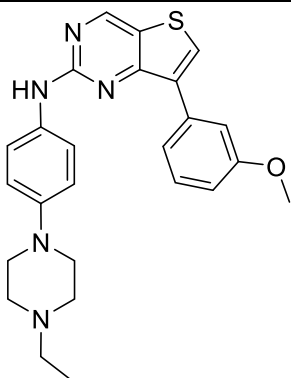

7.92

120

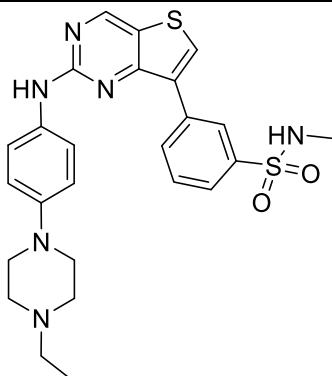

7.95

121

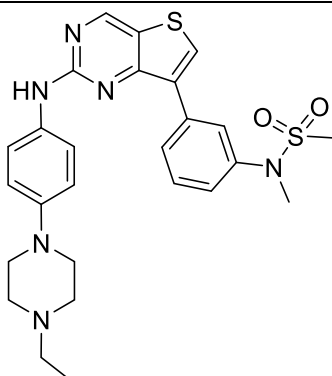

7.67

122

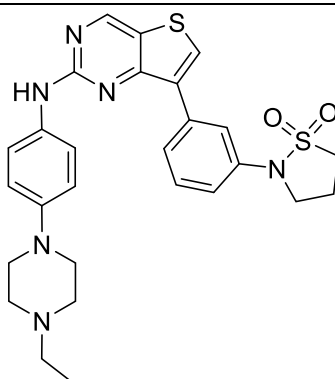

7.48

123

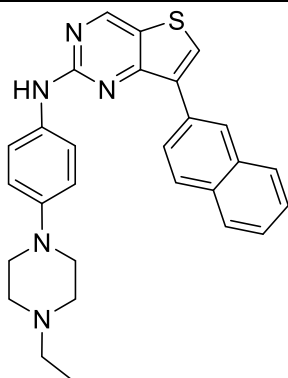

6.89

124

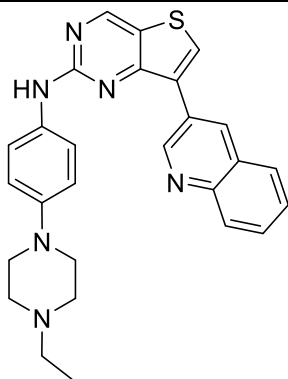

7.53

125

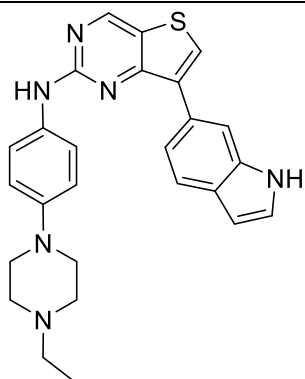

7.26

**Table S4.** Random draw table for test set compounds.

| High activity |       |          | Low activity |      |          | Medium activity |      |          |       |
|---------------|-------|----------|--------------|------|----------|-----------------|------|----------|-------|
| C99           | 8.09  | 0.046511 | C91          | 7.04 | 0.047715 | C94             | 7.1  | 0.067219 | SET-A |
| C95           | 8.15  | 0.056668 | C10          | 7.05 | 0.092258 | C56             | 7.57 | 0.070681 |       |
| C22           | 7.81  | 0.119098 | C66          | 6.87 | 0.115795 | C50             | 7.41 | 0.094359 |       |
| C74           | 8.88  | 0.135938 | C01          | 6.76 | 0.124531 | C110            | 7.5  | 0.11626  |       |
| C112          | 7.67  | 0.142158 | C64          | 6.92 | 0.156929 | C93             | 7.45 | 0.146571 |       |
| C97           | 7.74  | 0.154044 | C123         | 6.89 | 0.205567 | C51             | 7.23 | 0.160988 | SET-B |
| C120          | 7.95  | 0.170794 | C59          | 6.14 | 0.222062 | C118            | 7.44 | 0.185591 |       |
| C119          | 7.92  | 0.184314 | C45          | 6.8  | 0.224221 | C122            | 7.48 | 0.200651 |       |
| C82           | 8.29  | 0.188492 | C48          | 6.45 | 0.238903 | C04             | 7.2  | 0.217415 |       |
| C36           | 8.2   | 0.188558 | C07          | 6.94 | 0.246183 | C15             | 7.54 | 0.245775 |       |
| C76           | 9.24  | 0.19125  | C40          | 6.85 | 0.247239 | C62             | 7.14 | 0.251774 | SET-C |
| C19           | 7.94  | 0.270151 | C46          | 6.73 | 0.396101 | C73             | 7.53 | 0.263063 |       |
| C26           | 7.98  | 0.27297  | C54          | 6.48 | 0.418428 | C03             | 7.17 | 0.288624 |       |
| C83           | 8.49  | 0.285854 | C116         | 6.49 | 0.425414 | C49             | 7.1  | 0.318349 |       |
| C121          | 7.67  | 0.291042 | C39          | 6.45 | 0.427529 | C27             | 7.07 | 0.329871 |       |
| C16           | 7.64  | 0.32477  | C105         | 5.62 | 0.433339 | C11             | 7.26 | 0.334799 | SET-D |
| C75           | 8.74  | 0.366041 | C44          | 5.97 | 0.449833 | C124            | 7.53 | 0.338937 |       |
| C108          | 8     | 0.373527 | C58          | 6.78 | 0.464327 | C12             | 7.32 | 0.3417   |       |
| C63           | 7.61  | 0.374259 | C70          | 6.82 | 0.490395 | C14             | 7.23 | 0.368718 |       |
| C114          | 7.74  | 0.416158 | C85          | 6.69 | 0.493984 | C89             | 7.25 | 0.375657 |       |
| C86           | 7.74  | 0.429647 | C42          | 6.42 | 0.498409 | C98             | 7.16 | 0.476172 | SET-A |
| C101          | 8.15  | 0.495314 | C69          | 6.95 | 0.547368 | C65             | 7.31 | 0.484069 |       |
| C18           | 7.62  | 0.519801 | C47          | 6.49 | 0.606051 | C25             | 7.31 | 0.484779 |       |
| C71           | 9.55  | 0.53617  | C38          | 5.96 | 0.642058 | C57             | 7.56 | 0.557927 |       |
| C72           | 9.35  | 0.559578 | C52          | 6.77 | 0.659376 | C28             | 7.08 | 0.574669 |       |
| C17           | 7.64  | 0.625503 | C35          | 6.62 | 0.669621 | C20             | 7.36 | 0.596315 | SET-B |
| C80           | 9.46  | 0.633174 | C68          | 6.92 | 0.694384 | C125            | 7.26 | 0.598507 |       |
| C24           | 8.14  | 0.750463 | C111         | 6.44 | 0.700532 | C87             | 7.58 | 0.63906  |       |
| C84           | 9.37  | 0.75299  | C53          | 6.7  | 0.702626 | C60             | 7.54 | 0.681378 |       |
| C13           | 7.65  | 0.805919 | C90          | 6.17 | 0.753446 | C06             | 7.48 | 0.694101 |       |
| C109          | 7.92  | 0.817795 | C115         | 5.78 | 0.758656 | C96             | 7.52 | 0.722374 | SET-C |
| C102          | 7.79  | 0.849353 | C32          | 6.95 | 0.798334 | C21             | 7.58 | 0.770724 |       |
| C61           | 7.59  | 0.852992 | C104         | 5.39 | 0.800923 | C117            | 7.22 | 0.820879 |       |
| C78           | 8.6   | 0.909932 | C33          | 6.94 | 0.810285 | C23             | 7.42 | 0.844675 |       |
| C81           | 10.04 | 0.922773 | C34          | 6.96 | 0.823336 | C31             | 7.06 | 0.849694 |       |
| C92           | 7.82  | 0.926264 | C37          | 6.87 | 0.827899 | C05             | 7.23 | 0.855154 | SET-D |
| C100          | 7.92  | 0.930799 | C113         | 6.71 | 0.847475 | C02             | 7.22 | 0.855431 |       |
| C103          | 7.88  | 0.958278 | C29          | 6.96 | 0.848348 | C67             | 7.14 | 0.870785 |       |
| C08           | 7.71  | 0.980281 | C43          | 6.19 | 0.866393 | C30             | 7.07 | 0.922571 |       |
| C79           | 9.35  | 0.981901 | C106         | 6.14 | 0.985245 | C55             | 7.31 | 0.937029 |       |
| C77           | 9.95  | 0.987713 | C41          | 6.48 | 0.994829 | C88             | 7.3  | 0.940625 | SET-A |
|               |       |          |              |      |          | C09             | 7.19 | 0.94266  |       |

**Table S5.** Statistics of CoMSIA model development.

| CoMSIA | $q^2$        | ONC      | SEP          | $r^2$        | SEE          | F-value | Field Contribution |      |      |      |      |
|--------|--------------|----------|--------------|--------------|--------------|---------|--------------------|------|------|------|------|
|        |              |          |              |              |              |         | S                  | E    | H    | A    | D    |
| S      | <b>0.476</b> | <b>2</b> | <b>0.615</b> | <b>0.608</b> | <b>0.532</b> | 69.815  | 100                | -    | -    | -    | -    |
| E      | 0.543        | 3        | 0.577        | 0.672        | 0.489        | 60.786  | -                  | 100  | -    | -    | -    |
| H      | 0.462        | 4        | 0.630        | 0.710        | 0.463        | 53.777  | -                  | -    | 100  | -    | -    |
| A      | 0.412        | 2        | 0.651        | 0.527        | 0.584        | 50.123  | -                  | -    | -    | 100  | -    |
| D      | 0.475        | 5        | 0.626        | 0.711        | 0.465        | 42.738  | -                  | -    | -    | -    | 100  |
| SE     | 0.552        | 6        | 0.582        | 0.853        | 0.333        | 82.997  | 31.2               | 68.8 | -    | -    | -    |
| EH     | 0.533        | 6        | 0.594        | 0.854        | 0.332        | 83.767  | -                  | 62.7 | 37.3 | -    | -    |
| EA     | 0.531        | 2        | 0.582        | 0.656        | 0.498        | 85.688  | -                  | 59.1 | -    | 40.9 | -    |
| ED     | 0.626        | 6        | 0.531        | 0.838        | 0.352        | 73.143  | -                  | 59.4 | -    | -    | 40.6 |
| SH     | 0.488        | 2        | 0.608        | 0.641        | 0.509        | 80.493  | 49.9               | -    | 50.1 | -    | -    |
| SA     | 0.476        | 5        | 0.626        | 0.786        | 0.400        | 63.954  | 41.1               | -    | -    | 59.9 | -    |
| SD     | 0.544        | 4        | 0.580        | 0.749        | 0.430        | 65.747  | 42.8               | -    | -    | -    | 57.2 |
| HA     | 0.426        | 5        | 0.654        | 0.760        | 0.423        | 55.022  | -                  | -    | 46.9 | 53.1 | -    |
| HD     | 0.575        | 4        | 0.560        | 0.768        | 0.414        | 72.690  | -                  | -    | 48.1 | -    | 51.9 |
| AD     | 0.487        | 3        | 0.612        | 0.666        | 0.494        | 59.212  | -                  | -    | -    | 54.6 | 45.4 |
| SHE    | 0.556        | 6        | 0.579        | 0.877        | 0.305        | 102.032 | 21.2               | 49.9 | 29.3 | -    | -    |
| SEA    | 0.561        | 6        | 0.576        | 0.864        | 0.320        | 91.420  | 20.4               | 47.0 | -    | 32.6 | -    |
| SED    | 0.656        | 6        | 0.510        | 0.862        | 0.323        | 89.719  | 18.7               | 46.1 | -    | -    | 35.2 |
| EHA    | 0.543        | 6        | 0.588        | 0.853        | 0.333        | 83.432  | -                  | 44.6 | 25.0 | 30.3 | -    |

|       |       |   |       |       |       |         |      |      |      |      |      |
|-------|-------|---|-------|-------|-------|---------|------|------|------|------|------|
| EHD   | 0.631 | 6 | 0.528 | 0.863 | 0.322 | 90.298  | -    | 42.7 | 23.2 | -    | 34.1 |
| SHA   | 0.490 | 5 | 0.617 | 0.811 | 0.376 | 74.442  | 25.6 | -    | 33.9 | 40.6 | -    |
| SHD   | 0.574 | 4 | 0.561 | 0.783 | 0.400 | 79.243  | 23.9 | -    | 34.9 | -    | 41.2 |
| EAD   | 0.602 | 5 | 0.545 | 0.817 | 0.369 | 77.741  | -    | 43.6 | -    | 26.5 | 29.9 |
| HAD   | 0.540 | 5 | 0.586 | 0.801 | 0.385 | 70.045  | -    | -    | 32.9 | 32.2 | 34.9 |
| SEHD  | 0.639 | 6 | 0.522 | 0.874 | 0.309 | 99.200  | 14.2 | 35.8 | 19.3 | -    | 30.6 |
| SEHA  | 0.559 | 6 | 0.577 | 0.873 | 0.310 | 98.318  | 15.5 | 37.0 | 20.5 | 27.0 | -    |
| SEAD  | 0.639 | 6 | 0.522 | 0.863 | 0.321 | 90.442  | 14.9 | 34.9 | -    | 23.9 | 26.3 |
| EHAD  | 0.620 | 6 | 0.536 | 0.863 | 0.322 | 90.308  | -    | 33.8 | 18.9 | 21.6 | 25.8 |
| SHAD  | 0.584 | 5 | 0.557 | 0.827 | 0.359 | 83.193  | 18.0 | -    | 25.3 | 27.2 | 29.6 |
| SEHAD | 0.639 | 6 | 0.522 | 0.875 | 0.307 | 100.545 | 12.0 | 28.7 | 15.7 | 19.9 | 23.7 |

(S: Steric; E: Electrostatic; H: Hydrophobic; A: H-bond acceptor; D: H-bond donor).

**Table S6.** Actual vs. predicted pIC<sub>50</sub> values of CoMFA and CoMSIA (SET-D) models.

| #Cpd | CoMFA        |                 |           | CoMSIA (SED) |                 |           |
|------|--------------|-----------------|-----------|--------------|-----------------|-----------|
|      | Actual pIC50 | Predicted pIC50 | Residuals | Actual pIC50 | Predicted pIC50 | Residuals |
| C105 | 5.62         | 5.777           | -0.157    | 5.62         | 5.962           | -0.342    |
| C115 | 5.78         | 6.415           | -0.635    | 5.78         | 6.592           | -0.812    |
| C38  | 5.96         | 6.966           | -1.006    | 5.96         | 6.105           | -0.145    |
| C44  | 5.97         | 7.492           | -1.522    | 5.97         | 6.622           | -0.652    |
| C59  | 6.14         | 7.428           | -1.288    | 6.14         | 7.506           | -1.366    |
| C90  | 6.17         | 6.305           | -0.135    | 6.17         | 6.658           | -0.488    |
| C42  | 6.42         | 6.604           | -0.184    | 6.42         | 6.466           | -0.046    |
| C111 | 6.44         | 6.381           | 0.059     | 6.44         | 6.702           | -0.262    |
| C39  | 6.45         | 6.251           | 0.199     | 6.45         | 6.402           | 0.048     |
| C48  | 6.45         | 6.5             | -0.05     | 6.45         | 6.165           | 0.285     |
| C54  | 6.48         | 6.29            | 0.19      | 6.48         | 6.832           | -0.352    |
| C47  | 6.49         | 6.683           | -0.193    | 6.49         | 6.237           | 0.253     |
| C116 | 6.49         | 6.626           | -0.136    | 6.49         | 7.074           | -0.584    |
| C35  | 6.62         | 6.863           | -0.243    | 6.62         | 6.789           | -0.169    |
| C85  | 6.69         | 7.065           | -0.375    | 6.69         | 7.414           | -0.724    |
| C53  | 6.7          | 6.555           | 0.145     | 6.7          | 6.84            | -0.14     |
| C46  | 6.73         | 6.657           | 0.073     | 6.73         | 6.727           | 0.003     |
| C01  | 6.76         | 7.08            | -0.32     | 6.76         | 6.815           | -0.055    |
| C52  | 6.77         | 6.887           | -0.117    | 6.77         | 6.878           | -0.108    |
| C58  | 6.78         | 7.869           | -1.089    | 6.78         | 8.052           | -1.272    |
| C45  | 6.8          | 6.796           | 0.004     | 6.8          | 6.363           | 0.437     |
| C70  | 6.82         | 7.204           | -0.384    | 6.82         | 7.105           | -0.285    |
| C40  | 6.85         | 6.623           | 0.227     | 6.85         | 6.442           | 0.408     |
| C66  | 6.87         | 7               | -0.13     | 6.87         | 7.131           | -0.261    |
| C123 | 6.89         | 7.283           | -0.393    | 6.89         | 7.339           | -0.449    |
| C64  | 6.92         | 7.152           | -0.232    | 6.92         | 7.001           | -0.081    |
| C68  | 6.92         | 6.898           | 0.022     | 6.92         | 6.846           | 0.074     |
| C07  | 6.94         | 7.044           | -0.104    | 6.94         | 7.192           | -0.252    |
| C69  | 6.95         | 6.904           | 0.046     | 6.95         | 6.706           | 0.244     |
| C91  | 7.04         | 6.999           | 0.041     | 7.04         | 6.954           | 0.086     |
| C10  | 7.05         | 7.255           | -0.205    | 7.05         | 7.154           | -0.104    |
| C27  | 7.07         | 7.168           | -0.098    | 7.07         | 7.123           | -0.053    |
| C28  | 7.08         | 7               | 0.08      | 7.08         | 6.984           | 0.096     |
| C94  | 7.1          | 6.95            | 0.15      | 7.1          | 7.024           | 0.076     |
| C49  | 7.1          | 7.022           | 0.078     | 7.1          | 6.841           | 0.259     |
| C62  | 7.14         | 7.77            | -0.63     | 7.14         | 7.611           | -0.471    |
| C98  | 7.16         | 7.924           | -0.764    | 7.16         | 7.33            | -0.17     |
| C03  | 7.17         | 7.562           | -0.392    | 7.17         | 7.407           | -0.237    |
| C09  | 7.19         | 7.374           | -0.184    | 7.19         | 7.229           | -0.039    |
| C04  | 7.2          | 7.146           | 0.054     | 7.2          | 7.089           | 0.111     |
| C51  | 7.23         | 6.982           | 0.248     | 7.23         | 7.11            | 0.12      |
| C14  | 7.23         | 7.206           | 0.024     | 7.23         | 7.128           | 0.102     |
| C89  | 7.25         | 6.607           | 0.643     | 7.25         | 6.59            | 0.66      |
| C125 | 7.26         | 7.408           | -0.148    | 7.26         | 7.382           | -0.122    |
| C11  | 7.26         | 7.403           | -0.143    | 7.26         | 6.856           | 0.404     |

|      |      |       |        |      |       |        |
|------|------|-------|--------|------|-------|--------|
| C25  | 7.31 | 7.478 | -0.168 | 7.31 | 7.529 | -0.219 |
| C65  | 7.31 | 7.24  | 0.07   | 7.31 | 7.064 | 0.246  |
| C12  | 7.32 | 7.163 | 0.157  | 7.32 | 7.498 | -0.178 |
| C20  | 7.36 | 7.365 | -0.005 | 7.36 | 7.333 | 0.027  |
| C50  | 7.41 | 7.182 | 0.228  | 7.41 | 7.406 | 0.004  |
| C118 | 7.44 | 7.75  | -0.31  | 7.44 | 7.338 | 0.102  |
| C93  | 7.45 | 8.25  | -0.8   | 7.45 | 7.67  | -0.22  |
| C06  | 7.48 | 7.416 | 0.064  | 7.48 | 7.745 | -0.265 |
| C122 | 7.48 | 6.718 | 0.762  | 7.48 | 7.295 | 0.185  |
| C110 | 7.5  | 7.654 | -0.154 | 7.5  | 7.532 | -0.032 |
| C96  | 7.52 | 8.198 | -0.678 | 7.52 | 7.227 | 0.293  |
| C73  | 7.53 | 9.3   | -1.77  | 7.53 | 9.108 | -1.578 |
| C124 | 7.53 | 7.418 | 0.112  | 7.53 | 7.177 | 0.353  |
| C60  | 7.54 | 7.236 | 0.304  | 7.54 | 7.453 | 0.087  |
| C15  | 7.54 | 7.5   | 0.04   | 7.54 | 7.469 | 0.071  |
| C57  | 7.56 | 7.976 | -0.416 | 7.56 | 8.009 | -0.449 |
| C56  | 7.57 | 7.527 | 0.043  | 7.57 | 7.759 | -0.189 |
| C87  | 7.58 | 7.637 | -0.057 | 7.58 | 7.529 | 0.051  |
| C63  | 7.61 | 7.079 | 0.531  | 7.61 | 7.275 | 0.335  |
| C18  | 7.62 | 7.411 | 0.209  | 7.62 | 7.647 | -0.027 |
| C17  | 7.64 | 7.21  | 0.43   | 7.64 | 7.174 | 0.466  |
| C16  | 7.64 | 7.542 | 0.098  | 7.64 | 7.518 | 0.122  |
| C13  | 7.65 | 7.328 | 0.322  | 7.65 | 7.461 | 0.189  |
| C112 | 7.67 | 7.415 | 0.255  | 7.67 | 7.065 | 0.605  |
| C121 | 7.67 | 7.618 | 0.052  | 7.67 | 7.683 | -0.013 |
| C114 | 7.74 | 7.707 | 0.033  | 7.74 | 7.38  | 0.36   |
| C86  | 7.74 | 7.286 | 0.454  | 7.74 | 7.484 | 0.256  |
| C97  | 7.74 | 7.55  | 0.19   | 7.74 | 7.839 | -0.099 |
| C22  | 7.81 | 7.383 | 0.427  | 7.81 | 7.232 | 0.578  |
| C119 | 7.92 | 7.839 | 0.081  | 7.92 | 7.553 | 0.367  |
| C109 | 7.92 | 7.279 | 0.641  | 7.92 | 7.488 | 0.432  |
| C19  | 7.94 | 7.496 | 0.444  | 7.94 | 7.266 | 0.674  |
| C120 | 7.95 | 7.512 | 0.438  | 7.95 | 7.897 | 0.053  |
| C26  | 7.98 | 7.616 | 0.364  | 7.98 | 7.918 | 0.062  |
| C108 | 8    | 7.576 | 0.424  | 8    | 7.355 | 0.645  |
| C99  | 8.09 | 7.995 | 0.095  | 8.09 | 7.817 | 0.273  |
| C24  | 8.14 | 7.249 | 0.891  | 8.14 | 7.425 | 0.715  |
| C101 | 8.15 | 8.236 | -0.086 | 8.15 | 7.869 | 0.281  |
| C95  | 8.15 | 8.35  | -0.2   | 8.15 | 8.458 | -0.308 |
| C36  | 8.2  | 8.332 | -0.132 | 8.2  | 7.951 | 0.249  |
| C82  | 8.29 | 8.845 | -0.555 | 8.29 | 9.14  | -0.85  |
| C83  | 8.49 | 8.409 | 0.081  | 8.49 | 8.613 | -0.123 |
| C75  | 8.74 | 8.846 | -0.106 | 8.74 | 8.593 | 0.147  |
| C74  | 8.88 | 8.911 | -0.031 | 8.88 | 8.989 | -0.109 |
| C76  | 9.24 | 8.916 | 0.324  | 9.24 | 8.836 | 0.404  |
| C72  | 9.35 | 9.362 | -0.012 | 9.35 | 9.248 | 0.102  |
| C84  | 9.37 | 9.363 | 0.007  | 9.37 | 9.237 | 0.133  |
| C80  | 9.46 | 9.475 | -0.015 | 9.46 | 9.262 | 0.198  |
| C71  | 9.55 | 8.86  | 0.69   | 9.55 | 8.774 | 0.776  |
| C104 | 5.39 | 5.672 | -0.282 | 5.39 | 5.403 | -0.013 |
| C106 | 6.14 | 6.452 | -0.312 | 6.14 | 6.272 | -0.132 |
| C43  | 6.19 | 6.276 | -0.086 | 6.19 | 6.416 | -0.226 |
| C41  | 6.48 | 6.752 | -0.272 | 6.48 | 6.434 | 0.046  |
| C113 | 6.71 | 6.471 | 0.239  | 6.71 | 6.641 | 0.069  |
| C37  | 6.87 | 6.544 | 0.326  | 6.87 | 6.402 | 0.468  |
| C33  | 6.94 | 7.027 | -0.087 | 6.94 | 7.089 | -0.149 |
| C32  | 6.95 | 6.848 | 0.102  | 6.95 | 6.932 | 0.018  |
| C34  | 6.96 | 6.948 | 0.012  | 6.96 | 6.828 | 0.132  |
| C29  | 6.96 | 7.258 | -0.298 | 6.96 | 7.068 | -0.108 |
| C31  | 7.06 | 6.936 | 0.124  | 7.06 | 6.859 | 0.201  |
| C30  | 7.07 | 7.164 | -0.094 | 7.07 | 6.921 | 0.149  |
| C67  | 7.14 | 7.198 | -0.058 | 7.14 | 7.195 | -0.055 |

|      |       |       |        |       |       |        |
|------|-------|-------|--------|-------|-------|--------|
| C117 | 7.22  | 7.115 | 0.105  | 7.22  | 7.435 | -0.215 |
| C02  | 7.22  | 7.164 | 0.056  | 7.22  | 7.208 | 0.012  |
| C05  | 7.23  | 7.36  | -0.13  | 7.23  | 7.685 | -0.455 |
| C88  | 7.3   | 7.427 | -0.127 | 7.3   | 7.081 | 0.219  |
| C55  | 7.31  | 7.241 | 0.069  | 7.31  | 7.549 | -0.239 |
| C23  | 7.42  | 7.379 | 0.041  | 7.42  | 7.376 | 0.044  |
| C21  | 7.58  | 7.716 | -0.136 | 7.58  | 8.157 | -0.577 |
| C61  | 7.59  | 7.487 | 0.103  | 7.59  | 7.747 | -0.157 |
| C08  | 7.71  | 7.798 | -0.088 | 7.71  | 8.06  | -0.35  |
| C102 | 7.79  | 8.102 | -0.312 | 7.79  | 7.827 | -0.037 |
| C92  | 7.82  | 6.909 | 0.911  | 7.82  | 7.033 | 0.787  |
| C103 | 7.88  | 7.74  | 0.14   | 7.88  | 6.659 | 1.221  |
| C100 | 7.92  | 8.022 | -0.102 | 7.92  | 7.808 | 0.112  |
| C78  | 8.6   | 8.596 | 0.004  | 8.6   | 8.673 | -0.073 |
| C79  | 9.35  | 9.123 | 0.227  | 9.35  | 9.132 | 0.218  |
| C77  | 9.95  | 9.02  | 0.93   | 9.95  | 9.152 | 0.798  |
| C81  | 10.04 | 9.695 | 0.345  | 10.04 | 9.277 | 0.763  |

Test set data are shown in blue.

**Table S7.**  $\lambda$  parameters to gradually change the ligand interaction from state-A to state-B.

| $\lambda$ | Parameter id |       |       |       |       |       |       |       |       |       |       |     |
|-----------|--------------|-------|-------|-------|-------|-------|-------|-------|-------|-------|-------|-----|
|           | 1            | 2     | 3     | 4     | 5     | 6     | 7     | 8     | 9     | 10    | 11    | 12  |
| lambljA   | 1.0          | 0.909 | 0.818 | 0.727 | 0.636 | 0.545 | 0.455 | 0.364 | 0.273 | 0.182 | 0.091 | 0.0 |
| lambljB   | 0.0          | 0.091 | 0.182 | 0.273 | 0.364 | 0.455 | 0.545 | 0.636 | 0.727 | 0.818 | 0.909 | 1.0 |
| lambelA   | 1.0          | 0.909 | 0.818 | 0.727 | 0.636 | 0.545 | 0.455 | 0.364 | 0.273 | 0.182 | 0.091 | 0.0 |
| lambelB   | 0.0          | 0.091 | 0.182 | 0.273 | 0.364 | 0.455 | 0.545 | 0.636 | 0.727 | 0.818 | 0.909 | 1.0 |
| lambbondA | 1.0          | 0.909 | 0.818 | 0.727 | 0.636 | 0.545 | 0.455 | 0.364 | 0.273 | 0.182 | 0.091 | 0.0 |
| lambbondB | 0.0          | 0.091 | 0.182 | 0.273 | 0.364 | 0.455 | 0.545 | 0.636 | 0.727 | 0.818 | 0.909 | 1.0 |

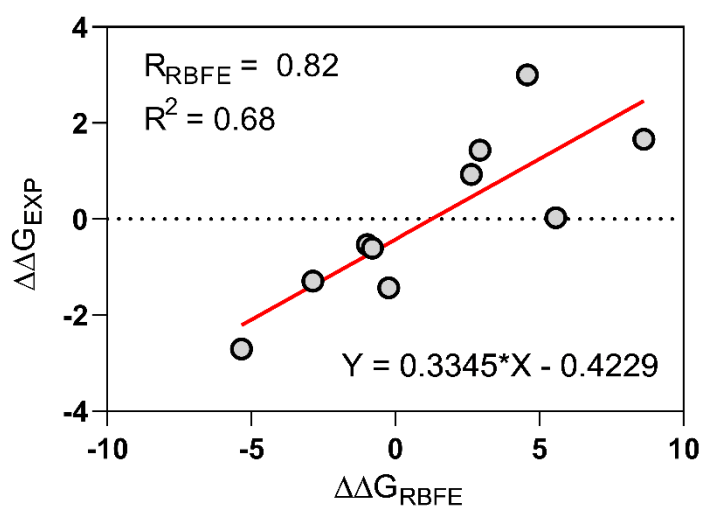

**Figure S2.** Correlation plot between experimental and computed relative binding free energies.
